# Supplementary material for: Guidelines for DNA recombination and repair studies: Mechanistic assays of DNA repair processes
Source: PubMed Central journal article supplement (PMC6334232; doi:10.15698/mic2019.01.665), 2019-01-07
Supplement: mic-06-065-s01.pdf [file mic-06-065-s01.pdf]

| <b>Title</b>                                                                                                                  | <b>Authors</b>                                                                                | <b>Contact information of lead authors</b> |
|-------------------------------------------------------------------------------------------------------------------------------|-----------------------------------------------------------------------------------------------|--------------------------------------------|
| 1. Dancing on DNA tightropes: watching repair proteins interrogate DNA in real time.                                          | Emily C. Beckwitt, Bennett Van Houten                                                         | vanhoutenb@upmc.edu                        |
| 2. Single-molecule FRET illuminates the non-homologous end joining process in vitro                                           | Michael J. Morten, Eli Rothenberg                                                             | eli.rothenberg@nyumc.org                   |
| 3. Single-molecule imaging measures dynamics and localization to uncover the mechanism of DNA mismatch repair in living cells | Julie S. Biteen                                                                               | jsbiteen@umich.edu                         |
| 4. Single-molecule DNA nanomanipulation                                                                                       | Shuang Wang, Terence R. Strick                                                                | strick@ijm.univ-paris-diderot.fr           |
| 5. Single-molecule PALM imaging of translesion polymerases in live bacterial cells                                            | Elizabeth S. Thrall, Joseph J. Loparo                                                         | joseph_loparo@hms.harvard.edu              |
| 6. Tracking-PALM: a direct single-molecule imaging method to study DNA repair in living bacteria                              | Oliver Pambos, Jun Fan, Hafez el Sayyed, Achillefs Kapanidis                                  | achillefs.kapanidis@physics.ox.ac.uk       |
| 7. Biochemical analyses of recombinase filament assembly                                                                      | Hsin-Yi Yeh, Yi-Hsuan Chang <sup>1</sup> , and Peter Chi                                      | peterhchi@ntu.edu.tw                       |
| 8. Assaying DNA repair synthesis by DNA polymerase $\delta$ and its stimulation by Pif1 helicase                              | Youngho Kwon, Patrick Sung                                                                    | Patrick.sung@yale.edu                      |
| 9. Assaying DNA Helicases for Processing Homologous Recombination Intermediates                                               | Quan Wang, Hengyao Niu                                                                        | hniu@indiana.edu                           |
| 10. Fluorescence-based assays for structure-selective endonucleases                                                           | João P. Vieira-da-Rocha, Kenny Ang, Sucheta Mukherjee, Michelle R. Arkin, Wolf-Dietrich Heyer | wdheyer@ucdavis.edu                        |
